# Supplementary material for: Rapid solid-state synthesis of Mn3O4 nanocrystals at room temperature
Source: Royal Society of Chemistry journal article supplement (doi:10.1039/d4nj03977g), 2024-01-01
Supplement: d4nj03977g1.pdf [file d4nj03977g1.pdf]

## Rapid solid-state synthesis of $\text{Mn}_3\text{O}_4$ nanocrystals at room temperature

Wei Chen<sup>a</sup>, Haisheng Fang<sup>a,b,\*</sup>

<sup>a</sup> Faculty of Metallurgy and Energy Engineering, Kunming University of Science and Technology, Kunming, 650093, China

<sup>b</sup> Ganjiang Innovation Academy, Chinese Academy of Sciences, Ganzhou, 341119, China

\* Corresponding author. E-mail address: hsfang@gia.cas.cn (Haisheng Fang).

### Experimental

Chemicals of hydrated manganese salt ( $\text{MnSO}_4 \cdot \text{H}_2\text{O}$ ,  $\text{MnCl}_2 \cdot 4\text{H}_2\text{O}$  or  $\text{Mn}(\text{CH}_3\text{COO})_2 \cdot 4\text{H}_2\text{O}$  (AR, Sinopharm Chemical Reagent Co., Ltd)) and NaOH (AR, Sinopharm Chemical Reagent Co., Ltd) in a mole ratio of 1:2.05 were mixed by ball-milling at 300 rpm for 30 min with changing the direction of rotation per 15 min. During the mixing process, the solid-state reaction between hydrated manganese salt and NaOH took place, and  $\text{Mn}(\text{OH})_2$  was produced and air-oxidized. The obtained mixture was thoroughly washed by deionized water to remove sodium salts and residual NaOH, and then dried in vacuum at 80 °C.

For comparison, the reactions between manganese salts and NaOH in aqueous solution in a mole ratio of 1:2.05 were performed. For low-concentration reaction, the solution of 2.46 M NaOH was added dropwise to the solution of 0.3 M  $\text{MnSO}_4$  and stirred in air at room temperature for 30 min, and then the suspension was filtered and fully washed by deionized water, and finally dried in vacuum at 80 °C. The high-concentration reaction between 3 M  $\text{MnSO}_4$  solution and 24.6 M NaOH solution was

also performed.

The crystalline phase of the reaction products were identified by X-ray diffraction (XRD, Rigaku-TTRIII18kW) utilizing  $\text{CuK}_\alpha$  radiation. The particle morphology and size of the products were observed by scanning electron microscopy (FE-SEM, ThermoScientific Apreo 2C) and transmission electron microscopy (TEM, FEI Tecnai G2 TF30). Magnetic properties were measured on a physical properties measurement system (PPMS DynaCool-14T, Quantum Design).

### Supplementary figure

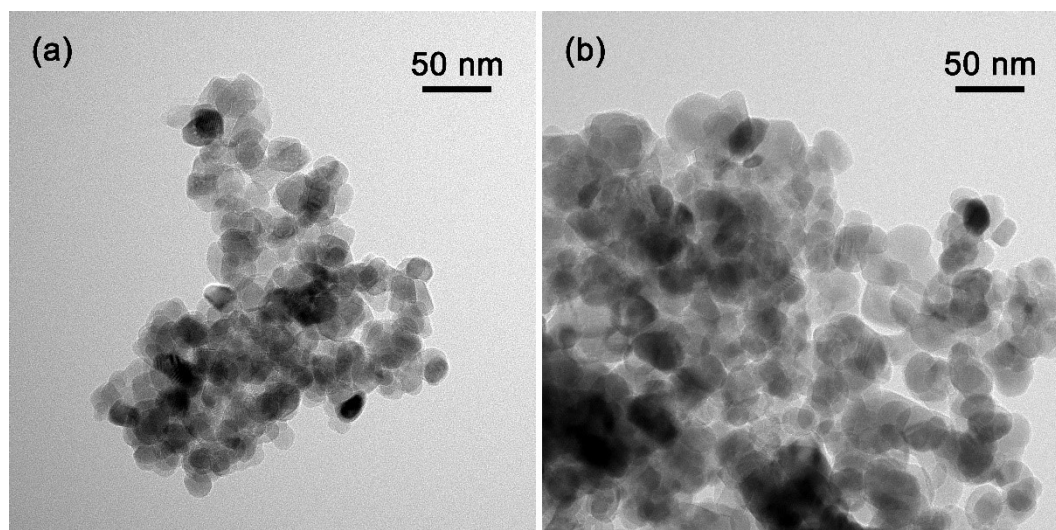

**Fig. S1** TEM images of the washed products from the solid-state reactions of (a)  $\text{MnSO}_4 \cdot \text{H}_2\text{O}$  and (b)  $\text{MnCl}_2 \cdot 4\text{H}_2\text{O}$  with NaOH.

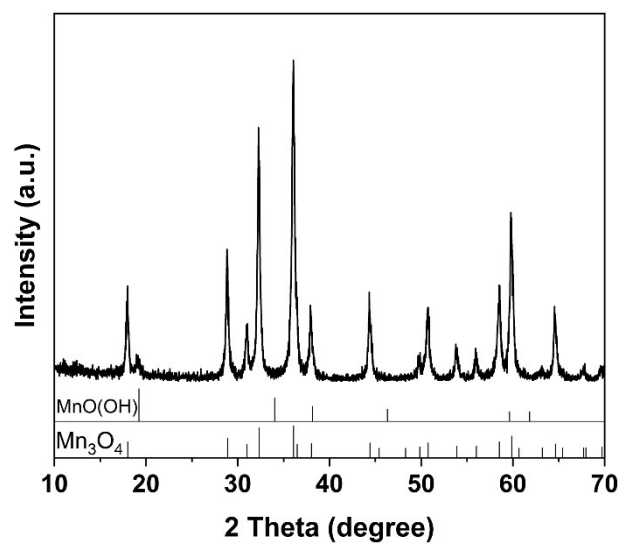

**Fig. S2** XRD pattern of the washed product by the solid-state reaction of  $\text{MnSO}_4 \cdot \text{H}_2\text{O}$  with 20% excess NaOH.
